# Supplementary material for: Kinematic control of extreme jump angles in the red leg running frog (Kassina maculata)
Source: Oxford University Press journal article supplement (doi:10.1242/jeb.144279), 2017-01-01
Supplement: jeb144279supp.pdf [file jeb144279supp.pdf]

**Table S1.** Kinematics data used for statistical analyses. Each value represents a data point from a single trial from one of 4 frogs, KM03, KM04, KM05 and KM06. All angle values are in degrees whereas velocity values are in snout-vent lengths-per-second

[Click here to Download Table S1](#)
